# Supplementary material for: Phenotypic Variation and Relationships of Grain Yield, Protein Content and Uav-Derived Ndvi in Spring Wheat under Nordic-Baltic Environments
Source: Preprints.org preprint supplement (doi:10.20944/preprints202312.0757.v1), 2023-12-12
Supplement: Supplementary file 3 [file supplementary]

## Sheet: Table S1
Table S1. Name, origin and description of the spring wheat genotypes selected for study.
Genotype name	Provider	Country of origin	Description; and specific characteristics
Runar	NMBU*	Norway	year of release 1972
Zombi	Graminor	Norway	GN11644; year of release 2018
Caress	NMBU	Sweden	year of release 2017
Betong	Graminor	Norway	GN13618; year of release 2019
Hiie	METK	Estonia	year of release 2016
Voore	METK	Estonia	year of release 2015
876	METK	Estonia	advanced breeding line
990-2	METK	Estonia	advanced breeding line
Robijs	AREI	Latvia	year of release in Latvia 2011
013-032	AREI	Latvia	advanced breeding line; spring and winter wheat combination
013-01	AREI	Latvia	advanced breeding line; yield potential, medium early
013-074	AREI	Latvia	advanced line; grain quality
DS-17-16-DH	LAMMC	Lithuania	registered as cultivar ‘Merkys DS’ in 2023 in Lithuania, high yielding
DS-638-5-DH	LAMMC	Lithuania	advanced breeding line, derived from spring/winter wheat cross combination, extended vegetation period, high yielding
DS-655-7-DH	LAMMC	Lithuania	advanced breeding line, high yielding
DS-720-3-DH	LAMMC	Lithuania	advanced breeding line, high yielding
*NMBU - Norwegian University of Life Sciences; METK - Centre of Estonian Rural Research and Knowledge; AREI - Agricultural resources and Economics; LAMMC - Research Centre for Agriculture and Forestry.

## Sheet: Table S2
Table S2. Physical and chemical properties of the experimental soil before sowing at four locations (EE, LV, LT, NO) and two growing year (2021, 2022)
Environments	Soil type	Humus (%)	pH (KCl)	Available P, mg kg-1	Available K, mg kg-1
EE_2021	Calcaric Amphiluvic Rendzic Phaeozem (Loamic)	3.2	5.9	201	147
EE_2022	Calcaric Amphiluvic Rendzic Phaeozem (Loamic)	3.8	5.8	144	197
LV_2021	Albeluvisol (eutric)	1.8	5.4	102.8	90.5
LV_2022	Albeluvisol (eutric)	1.7	5.5	106.9	125.4
LT_2021	Cambisol	3.6	7.3	144.6	253.8
LT_2022	Cambisol	1.9	7.6	157.7	277.7
NO_2021	Loam	2.4	6.2	160	100
NO_2022
EE - Estonia; LV- Latvia; LT - Lithuania; NO - Norway; 2021 and 2022 - trial years.

## Sheet: Table S3
Table S3. Results of 3-way ANOVA for GY, GPC and NDVI at different growth stages
N level (N), Genotype (G), Year (Y) fixed effects in the model
	The mean squares (MS)
	G	N	Y	G x N	N x Y	G x Y	G x N x Y
Grain yield
EE	5738***	19647*	744109***	448	9388***	3371***	245
LT	17226***	1484	96897***	3123	28253**	4224	3044
LV	18596***	6257	559668***	1069	3252	6205***	1321
NO	28283***	90248***	403021***	3111	25189***	5574**	968
Grain protein content
EE	2.31***	47.73**	227.90***	0.195	22.98***	0.237	0.13
LT	1.38***	8.22*	370.6***	0.14	0.02	0.53*	0.28
LV	3.51***	27.54**	39.40***	0.388	1.39*	0.5*	0.265
NO	9.84***	58.89***	142.04***	0.348	6.15***	1.74***	0.426
NDVI_GS25
EE	0.0087	0.0264*	0.473***	0.00134616	0.0103756	0.00814854	0.00221626
LT	0.018***	0.028**	0.028**	0.00173482	0.0214*	0.00586418	0.00155186
LV	0.0086***	0.0004	0.150***	0.0003	0.0007	0.002*	0.000179651
NO	0.0047156	0.0075176	0.156***	0.0028234	0.00875887	0.00719198	0.00546446
NDVI_GS55
EE	0.0006*	0.0021*	0.0027**	7.61253e-05	6.60352e-05	0.000199291	6.73056e-05
LT	0.0021***	0.002*	0.0067***	0.000181019	0.000596999	0.000381071	0.0002159
LV	0.0012***	0.0043***	0.054***	0.0001	0.0002	0.0002*	0.0001
NO	0.001**	0.013***	0.00132179	0.000590736	0.0209***	0.0005783	0.000519318
NDVI_GS75
EE	0.0090**	0.00182542	0.0028261	0.000871458	0.00167278	0.000917077	0.000543968
LT	0.018***	0.0253***	0.022***	0.00115206	0.019**	0.0014028	0.00076523
LV	0.013***	0.0111***	0.0523***	0.000769369	0.0039*	0.00138343	0.000466125
NO	0.0043***	0.026***	0.0079***	0.000748178	0.0289***	0.00106383	0.000360431
NDVI_GS75
EE	0.0166***	0.0220*	0.013106	0.000844396	0.00057721	0.00341895	0.000638424
LT	0.009***	0.0130***	0.139***	0.000607154	0.000766036	0.000259481	0.000259781
LV	0.0098***	0.0280***	0.009***	0.000503872	4.99324e-05	0.001*	0.000591557
NO	0.049***	0.239***	0.315***	0.00100146	0.023***	0.0029*	0.000878271
G - genotype, N - N level, Y - year
Signif. codes: *** p< 0.001; ** p<0.01 * p<0.05

## Sheet: Table S4
Table S4. Results of 2-way ANOVA for GY, GPC and NDVI at different growth stages
Environment	SST% and significance of the model
	Genotype (G)	N level (N)	G x N
Grain yield (GY), g m-2
EE_2021	55.7***	17.5***	3.5
EE_2022	26.2***	59.6***	2.7
LV_2021	54.0***	16.2***	2.7
LV_2022	72.3***	2.9*	8.6
LT_2021	53.5***	9.5***	16.6
LT_2022	45.3***	1.2	11.9
NO_2021	45.9***	44.8***	4.4
NO_2022	64.7***	3.15*	7.9
Grain protein content (GPC), %
EE_2021	31.2***	58.1***	1.1
EE_2022	7.4***	87.1***	2
LV_2021	36.8***	37.2***	5.9
LV_2022	49.1***	33.9***	7.8
LT_2021	23.2*	49.5***	6.2
LT_2022	29.1***	49.4***	5.2
NO_2021	43.5***	44.5***	6.8
NO_2022	79.9***	12.6***	5.8
NDVI_GS25
EE_2022	36	0.3	8.1
LV_2021	85.7***	0.02	2.5
LV_2022	84.7***	0.9	4.5
LT_2021	65.0***	0.1	6.5
LT_2022	35.7*	19.1***	8.6
NO_2021	33.6	10.7**	13.7
NO_2022	21.5	0	17.4
NDVI_GS55
EE_2021	41.1*	14.0**	9.3
EE_2022	29	2.6	4.2
LV_2021	54.6***	12.2***	12.3
LV_2022	76.3***	13.2***	3.5
LT_2021	53.2**	0.7	8.8
LT_2022	43.8*	7.9*	6.3
NO_2021	15.4***	78.1***	2.8
NO_2022	32.5	0.6	21.9
NDVI_GS75
EE_2021	63.2***	2.9	3.9
EE_2022	34.7	0	5.9
LV_2021	73.6***	8.1***	5.7
LV_2022	69.1***	0.7	6.5
LT_2021	80.9***	0.1	5.4
LT_2022	45.7**	17.3***	6.6
NO_2021	26.9***	57.0***	5.7
NO_2022	58.8***	0	11.7
NDVI_GS85
EE_2021	68.0***	6.9**	2.4
EE_2022	37.9	1.9	4.2
LV_2021	56.6***	12.8***	9.6
LV_2022	74.4***	10.5***	4.6
LT_2021	77.9***	7.0***	5.2
LT_2022	66.2***	5.2**	7.3
NO_2021	48.7***	41.6***	1.7
NO_2022	80.4***	8.2***	2.9
Environment: combination of location x year
* - p<0.05; **p<0.01; ***p<0.001
SST% - the partitioning of the percentage of factors
GS25 –tillering growth stage; GS55 – heading growth stage; GS75 – milk growth stage; GS85 – dough growth stage.
